# Supplementary material for: Design, screening, and properties of novel solvates of azoxystrobin based on isomorphism
Source: Royal Society of Chemistry journal article supplement (doi:10.1039/d0ce00204f), 2020-01-01
Supplement: d0ce00204f1.pdf [file d0ce00204f1.pdf]

## Support Information

# Design, screening, and properties of novel solvates of azoxystrobin based on isomorphism

Zhi-Ping Shi,<sup>†</sup> Guo-Bin Ren,<sup>‡</sup> Ming-Hui Qi,<sup>‡,\*</sup> Zhong Li,<sup>†</sup> Xiao-Yong Xu<sup>†,\*\*</sup>

<sup>†</sup> Shanghai Key Laboratory of Chemical Biology, School of Pharmacy, East China University of Science and Technology, No. 130 Meilong Rd., Shanghai, 200237, PR China

<sup>‡</sup> State Key Laboratory of Bioreactor Engineering; Engineering Research Centre of Pharmaceutical Process Chemistry, Ministry of Education; Laboratory of Pharmaceutical Crystal Engineering & Technology, School of Pharmacy, East China University of Science and Technology, No. 130 Meilong Rd., Shanghai, 200237, PR China

\*Corresponding author E-mail: [mhqi@ecust.edu.cn](mailto:mhqi@ecust.edu.cn)

\*\*Corresponding author E-mail: [xyxu@ecust.edu.cn](mailto:xyxu@ecust.edu.cn)

1 Supplementary tables

2 Supplementary figures

Table S1. Summary of the molecular size of the solvent in the reported AZO solvates.

| Solvate (solvent) | Ratio | Solvent length (Å) | Solvent width (Å) | Solvent thickness (Å) |
|-------------------|-------|--------------------|-------------------|-----------------------|
| Diethyl oxalate   | 2:1   | 12.43              | 6.06              | 3.97                  |
| n-Heptane         | 2:1   | 11.71              | 4.37              | 3.97                  |
| Butyl acetate     | 2:1   | 11.41              | 5.36              | 3.97                  |
| Pyridine          | 1:1   | 6.52               | 6.49              | 3.0                   |
| 1,4-Dioxane       | 1:1   | 6.29               | 4.93              | 4.19                  |
| DCE               | 1:1   | 6.76               | 6.25              | 3.99                  |
| DMF               | 1:1   | 6.70               | 6.37              | 4.35                  |
| THF               | 1:1   | 6.41               | 6.37              | 3.98                  |
| Acetone           | 1:1   | 6.49               | 5.10              | 3.96                  |
| Acetic acid       | 1:1   | 6.26               | 5.10              | 3.96                  |
| Dichloromethane   | 1:1   | 6.69               | 4.76              | 4.02                  |
| Chloroform        | 1:1   | 6.65               | 6.25              | 4.54                  |

Table S2. Molecular sizes of 54 solvents

| Solvent                        | Length (Å) | Width (Å) | Thickness (Å) |
|--------------------------------|------------|-----------|---------------|
| <i>n</i> -Octanol              | 14.05      | 4.37      | 3.96          |
| Diethyl malonate               | 9.85       | 7.66      | 5.73          |
| <i>n</i> -Butyl ether          | 14.01      | 4.38      | 3.97          |
| <i>n</i> -Octane               | 13.00      | 4.43      | 3.97          |
| 1,2-Diethoxyethane             | 12.47      | 4.47      | 3.98          |
| Dimethyl succinate             | 12.34      | 4.35      | 3.98          |
| Ethyl butyrate                 | 11.42      | 5.29      | 3.97          |
| Isopropylbenzene               | 9.37       | 6.56      | 6.50          |
| Ethyl lactate                  | 10.09      | 6.21      | 5.27          |
| 4-Methyl-2-pentanone           | 9.08       | 5.27      | 5.70          |
| Ethyl cyanoacetate             | 10.69      | 5.38      | 3.98          |
| Paraxylene                     | 8.88       | 6.50      | 3.97          |
| <i>n</i> -Hexane               | 10.43      | 4.73      | 3.97          |
| Anisole                        | 9.30       | 6.49      | 4.42          |
| Methyl tert-butyl ether        | 7.57       | 6.52      | 5.30          |
| Cyclohexane                    | 7.22       | 6.54      | 4.98          |
| Toluene                        | 8.15       | 6.50      | 3.97          |
| Benzyl alcohol                 | 9.22       | 6.51      | 3.97          |
| Trifluorotoluene               | 8.40       | 6.51      | 4.93          |
| Sulfolane                      | 6.42       | 6.71      | 5.65          |
| 3-Methyl-1-butanol             | 8.90       | 5.96      | 4.96          |
| 2-Ethoxyethanol                | 9.92       | 4.46      | 3.98          |
| <i>N</i> -methylpyrrolidone    | 7.26       | 7.03      | 4.47          |
| <i>N,N</i> -dimethylacetamide  | 6.80       | 6.41      | 3.98          |
| 2-Methyltetrahydrofuran        | 7.52       | 5.84      | 5.05          |
| Cyclohexanone                  | 7.61       | 6.54      | 4.90          |
| Chlorobenzene                  | 8.59       | 6.51      | 3.60          |
| <i>tert</i> -Butanol           | 6.52       | 5.80      | 5.65          |
| Ether                          | 8.89       | 4.46      | 3.98          |
| <i>n</i> -butanol              | 8.91       | 4.36      | 3.96          |
| Cyclopentanol                  | 6.35       | 6.07      | 5.89          |
| Ethylene glycol dimethyl ether | 9.88       | 4.47      | 3.98          |
| Diethylamine                   | 8.99       | 4.42      | 3.97          |
| 2-Butanone                     | 7.82       | 5.20      | 3.96          |
| Ethyl acetate                  | 8.84       | 5.34      | 3.97          |
| 2-Nitropropane                 | 7.65       | 5.03      | 4.24          |
| 2-Butanol                      | 7.84       | 5.21      | 4.60          |
| Isobutanol                     | 7.05       | 6.55      | 6.30          |
| 1,3-Propanediol                | 8.67       | 4.34      | 3.98          |
| DMSO                           | 6.89       | 5.59      | 5.41          |
| Thiophene                      | 6.82       | 6.39      | 3.70          |
| 1,2-Propanediol                | 7.38       | 5.98      | 5.27          |

|                  |      |      |      |
|------------------|------|------|------|
| Isopropanol      | 6.53 | 5.85 | 5.27 |
| Ethyl formate    | 7.95 | 5.29 | 4.79 |
| Ethylene glycol  | 7.39 | 4.56 | 3.98 |
| 1-Propanol       | 7.62 | 4.35 | 3.98 |
| Trifluoroethanol | 6.79 | 4.94 | 4.64 |
| Furan            | 6.35 | 5.50 | 2.80 |
| Ethanol          | 6.33 | 4.12 | 3.97 |
| Nitromethane     | 5.04 | 4.98 | 3.99 |
| Acetonitrile     | 5.62 | 3.97 | 3.74 |
| Methanol         | 4.62 | 3.99 | 3.98 |
| Formic acid      | 5.05 | 4.84 | 2.80 |
| Water            | 3.78 | 3.07 | 2.80 |

Table S3. Interaction energies between AZO and solvent in AZO solvates.

| <b>Solvate (solvent)</b> | <b><math>\Delta E = E - (E1 + E2)</math> kJ/mol</b> |
|--------------------------|-----------------------------------------------------|
| Dimethyl succinate       | 13.73                                               |
| Diethyl oxalate          | 10.65                                               |
| <i>n</i> -Heptane        | 4.85                                                |
| Acetic acid              | 13.87                                               |
| DMF                      | 9.10                                                |
| Chloroform               | 8.64                                                |
| Acetone                  | 7.90                                                |
| 1,4-Dioxane              | 7.45                                                |
| THF                      | 6.37                                                |
| Dichloromethane          | 3.81                                                |
| Furan                    | 3.56                                                |
| 1,2-Dichloroethane       | 3.59                                                |
| Pyridine                 | 3.19                                                |

Table S4. Interaction energies between API and solvent in selected solvates.

| Solvate (CCDC) | Dimer structure                                                                     | $\Delta E = E - (E1 + E2)$ kJ/mol |
|----------------|-------------------------------------------------------------------------------------|-----------------------------------|
| 1867869        | 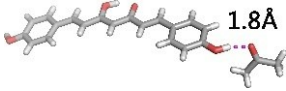   | 43.92                             |
| 798077         |    | 42.92                             |
| 1867871        |    | 41.67                             |
| 1867870        |    | 40.02                             |
| 768421         |  | 38.00                             |
| 798083         |  | 34.60                             |
| 1505332        |  | 32.91                             |
| 798080         |  | 31.67                             |
| 738267         |  | 30.91                             |
| 1404894        |  | 30.89                             |

|         |                                                                                     |       |
|---------|-------------------------------------------------------------------------------------|-------|
| 798079  | 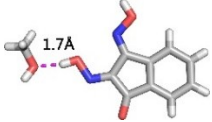   | 30.12 |
| 1505333 |    | 27.48 |
| 774768  |    | 26.52 |
| 798082  |    | 24.66 |
| 798081  |   | 22.51 |
| 1539150 |  | 22.30 |
| 774767  |  | 22.21 |

---

Table S5. Hydrogen bonds for six solvates.

| solvate | C-H...A                                             | Distance(Å) |                      |
|---------|-----------------------------------------------------|-------------|----------------------|
|         |                                                     | H...A       | Angle (°)<br>C-H...A |
| AZO-DMS | C <sub>11</sub> -H <sub>11</sub> ...O <sub>5</sub>  | 2.61        | 122.6                |
|         | C <sub>20</sub> -H <sub>20A</sub> ...O <sub>4</sub> | 2.65        | 159.7                |
|         | C <sub>22</sub> -H <sub>22C</sub> ...O <sub>4</sub> | 2.49        | 164.7                |
|         | C <sub>45</sub> -H <sub>45</sub> ...N <sub>1</sub>  | 2.55        | 135.1                |
|         | C <sub>11</sub> -H <sub>11</sub> ...O <sub>5</sub>  | 2.59        | 125.0                |
| AZO-FN  | C <sub>22</sub> -H <sub>22B</sub> ...O <sub>2</sub> | 2.55        | 157.1                |
|         | C <sub>22</sub> -H <sub>22C</sub> ...O <sub>4</sub> | 2.47        | 167.8                |
|         | C <sub>20</sub> -H <sub>20A</sub> ...O <sub>4</sub> | 2.59        | 163.2                |
|         | C <sub>15</sub> -H <sub>15</sub> ...O <sub>4</sub>  | 2.51        | 157.6                |
| AZO-BAC | C <sub>20</sub> -H <sub>20</sub> ...O <sub>4</sub>  | 2.51        | 85.7                 |
|         | C <sub>13</sub> -H <sub>13</sub> ...N <sub>2</sub>  | 2.78        | 138.3                |
|         | C <sub>14</sub> -H <sub>14</sub> ...O <sub>2S</sub> | 2.34        | 148.9                |
|         | C <sub>20</sub> -H <sub>20C</sub> ...O <sub>4</sub> | 2.40        | 91.3                 |
| AZO-DCE | C <sub>13</sub> -H <sub>13</sub> ...N <sub>2</sub>  | 2.78        | 138.2                |
|         | C <sub>15</sub> -H <sub>1AS</sub> ...N <sub>1</sub> | 2.56        | 103.3                |
|         | C <sub>15</sub> -H <sub>1BS</sub> ...N <sub>1</sub> | 2.48        | 119.3                |
| AZO-DCM | C <sub>20</sub> -H <sub>20C</sub> ...O <sub>4</sub> | 2.36        | 94.1                 |
|         | C <sub>13</sub> -H <sub>13</sub> ...N <sub>2</sub>  | 2.71        | 137.9                |
|         | C <sub>5</sub> -H <sub>5</sub> ...N <sub>1</sub>    | 2.79        | 157.6                |
| AZO-TCM | C <sub>20</sub> -H <sub>20C</sub> ...O <sub>4</sub> | 2.52        | 84.6                 |
|         | C <sub>13</sub> -H <sub>13</sub> ...N <sub>2</sub>  | 2.87        | 143.3                |
|         | C <sub>5</sub> -H <sub>5</sub> ...N <sub>1</sub>    | 2.45        | 137.2                |

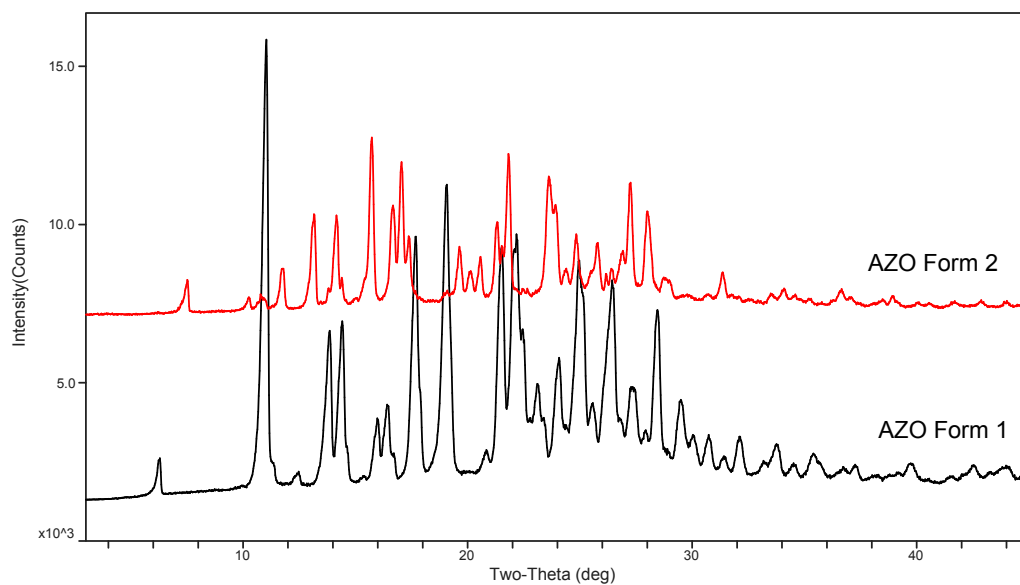

**Fig. S1.** PXRD patterns of AZO Form 1 and Form 2.

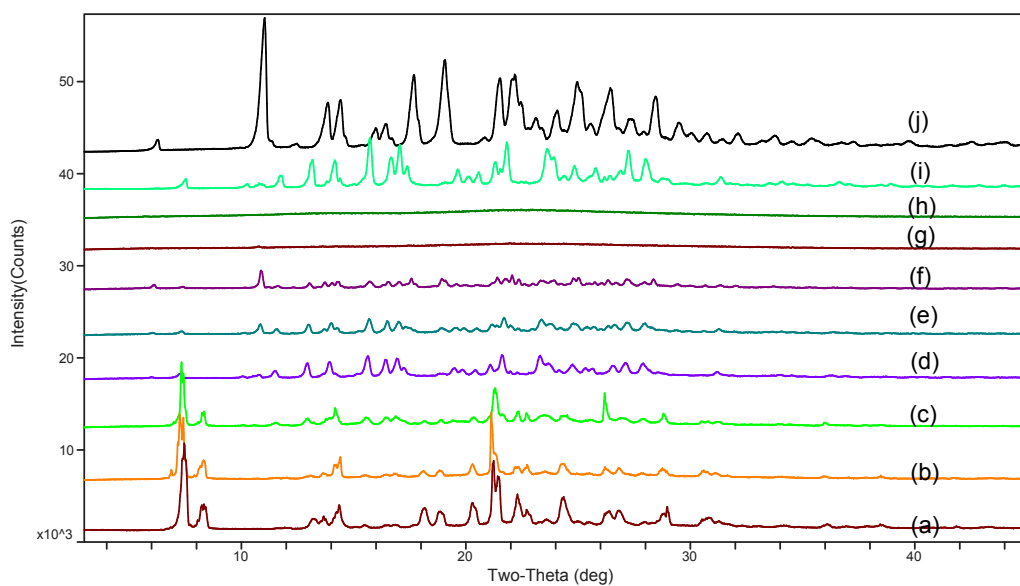

**Fig. S2.** Crystal form of (a) AZO-DEE, and AZO-DEE solvate heated to different temperatures: (b) 60 °C, (c) 70 °C, (d) 80 °C, (e) 90 °C, (f) 100 °C, (g) 110 °C, (h) 120 °C, (i) AZO form 2, and (j) AZO form 1.



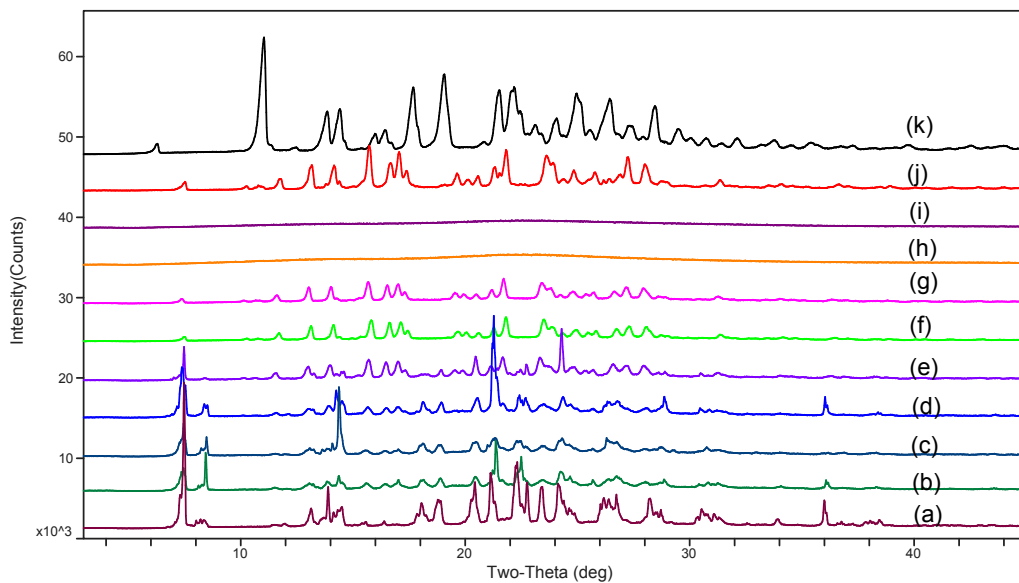

**Fig. S3.** Crystal form of (a) AZO-EB, and AZO-EB solvate heated to different temperatures: (b) 50 °C, (c) 60 °C, (d) 70 °C, (e) 80 °C, (f) 90 °C, (g) 100 °C (h) 110 °C, (i) 120 °C, (j) AZO form 2, and (k) AZO form 1.

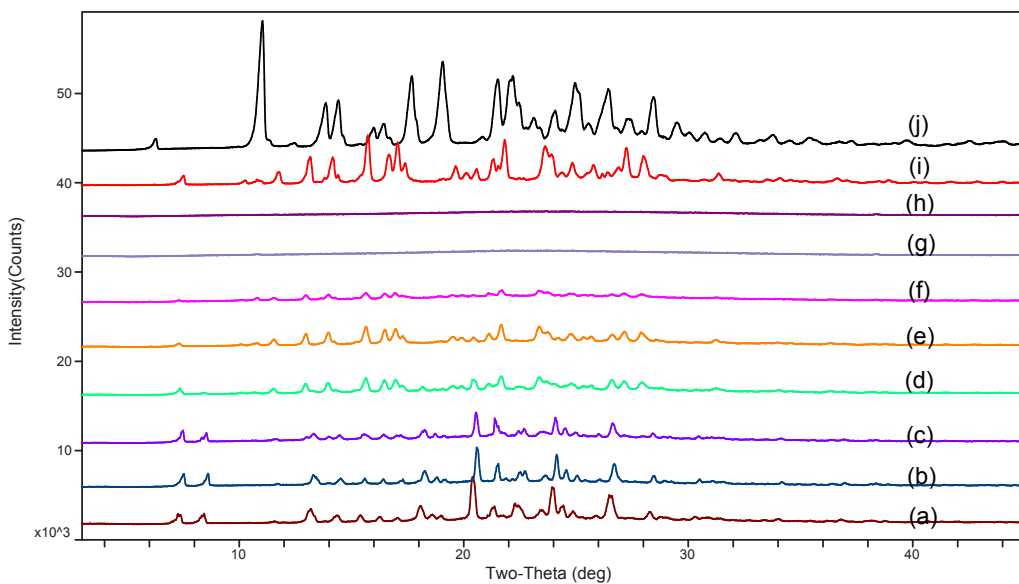

**Fig. S4.** Crystal form of (a) AZO-FN, and AZO-FN solvate heated to different temperatures: (b) 60 °C, (c) 70 °C, (d) 80 °C, (e) 90 °C, (f) 100 °C, (g) 110 °C, (h) 120 °C, (i) AZO form 2, and (j) AZO form 1.

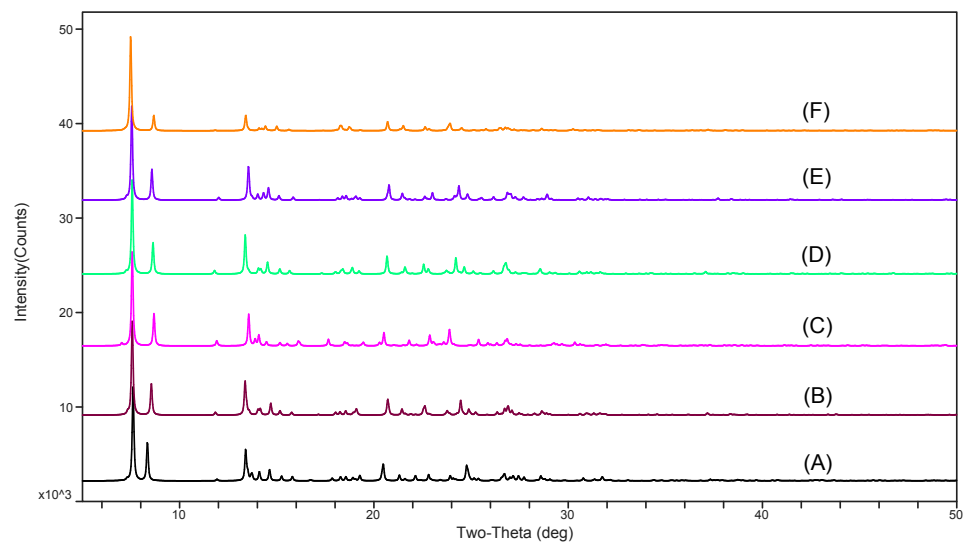

**Fig. S5.** Hypothetical powder X-ray diffractometric patterns of AZO solvates with (A) Dimethyl succinate, (B) butyl acetate, (C) chloroform, (D) furan, (E) dichloromethane, and (F) 1,2-dichloroethane, calculated from the unit cell structure, from which the solvent molecules had been removed using *Mercury 3.3* software.
